# Supplementary material
Source: Springer Nature journal article supplement (https://www.springermedizin.de/resource/supplementary/12936_2013_2745_MOESM6_ESM.pdf/9544176)
Supplement: MOESM6 [file 9544176]

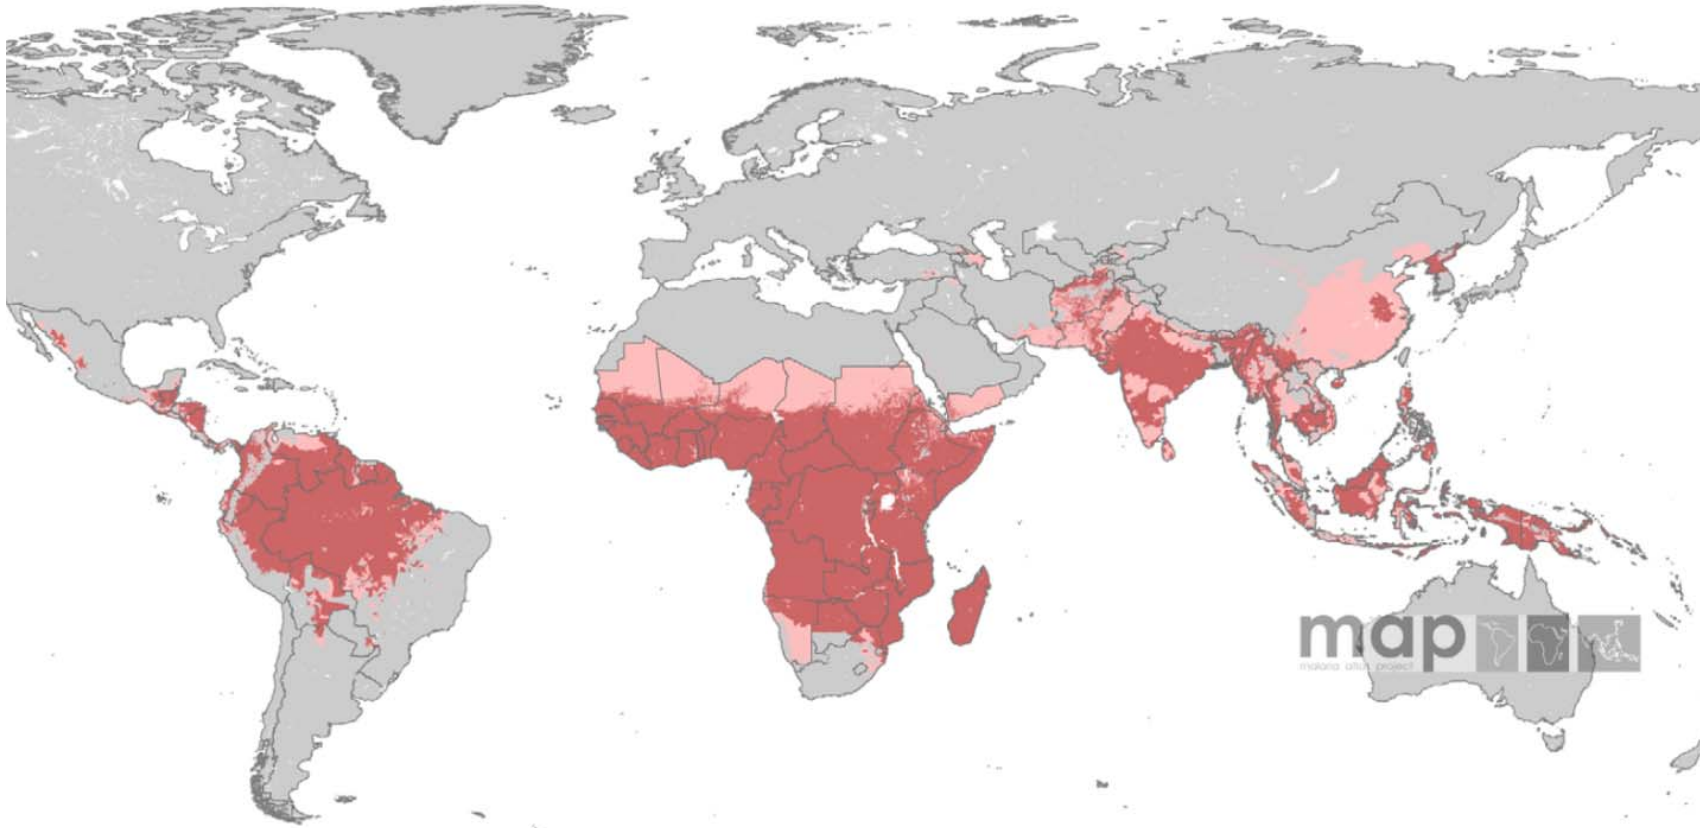

*The global spatial limits of Plasmodium vivax malaria transmission in 2009 as defined in Guerra et al [1]. Red areas represent stable transmission, pink areas display unstable transmission and grey areas are P. vivax free.*

## References

1. Guerra CA, Howes RE, Patil AP, Gething PW, Van Boeckel TP, Temperley WH, Kabaria CW, Tatem AJ, Manh BH, Elyazar IRF, et al: **The international limits and population at risk of Plasmodium vivax transmission in 2009.** *PLoS Negl Trop Dis* 2010, **4**:e774.
